# Supplementary material for: Mega-Analysis of Gray Matter Volume in Substance Dependence: General and Substance-Specific Regional Effects
Source: Atypon-hosted journal article supplement (doi:10.1176/appi.ajp.2018.17040415), 2018-10-19
Supplement: appi.ajp.2018.17040415.correction01.pdf [file appi.ajp.2018.17040415.correction01.pdf]

## **CORRECTION**

When the article “Mega-Analysis of Gray Matter Volume in Substance Dependence: General and Substance-Specific Regional Effects,” by Scott Mackey et al. (doi: 10.1176/appi.ajp.2018.17040415, *Am J Psychiatry* 2019; 176:119-128), was published, an author’s name was omitted. Reinout Wiers, Ph.D., from the Department of Psychology, University of Amsterdam, should have been listed as the 50th author. Dr. Wiers also should have been listed as the principal investigator on the NeuroADAPT data set in supplemental Table S1. These changes were made and the article was reposted on April 10, 2019.
